1 *For Ecological Applications: Research article*

2 *Running head: Ecosystem services in agroecosystems*

3

4 **Trade-offs in provisioning and stability of multiple ecosystem**  
5 **services in agroecosystems**

6

7 **Daniel Montoya<sup>1,2\*</sup>, Bart Haegeman<sup>1</sup>, Sabrina Gaba<sup>2</sup>, Claire de Mazancourt<sup>1</sup>,**

8 **Vincent Bretagnolle<sup>3,4</sup> & Michel Loreau<sup>1</sup>**

9 *<sup>1</sup>Centre for Biodiversity Theory and Modelling, Theoretical and Experimental Ecology*

10 *Station, CNRS, 2 route du CNRS, 09200 Moulis, France*

11 *<sup>2</sup>Agroécologie, AgroSup Dijon, INRA, Univ. Bourgogne Franche-Comté, F-21000*

12 *Dijon, France.*

13 *<sup>3</sup>Centre d'Etudes Biologiques de Chizé, UMR 7372, CNRS & Université de La*

14 *Rochelle, 79360 Villiers en Bois, France*

15 *<sup>4</sup>LTSER « Zone Atelier Plaine & Val de Sèvre », CNRS, 79360, Beauvoir sur Niort,*

16 *France*

17

18 **Author for correspondence:** Daniel Montoya, ([daniel.montoya@sete.cnrs.fr](mailto:daniel.montoya@sete.cnrs.fr))

19 Tel: (+33)(0)673360487

20 Centre for Biodiversity Theory and Modelling, Theoretical and Experimental Ecology

21 Station, CNRS, 2 route du CNRS, 09200 Moulis, France, &

22 UMR Agroécologie, Centre INRA Dijon, 17 Rue Sully, F-21065 Dijon Cedex, France

23

24 **Key words:** agricultural systems, ecosystem services, pollination, biodiversity, crop

25 production, trade-offs, stability

26 ***Abstract***

27 Changes in land use generate trade-offs in the delivery of ecosystem services in  
28 agricultural landscapes. However, we know little about how the stability of ecosystem  
29 services responds to landscape composition, and what ecological mechanisms underlie  
30 these trade-offs. Here, we develop a model to investigate the dynamics of three  
31 ecosystem services in intensively-managed agroecosystems, i.e. pollination-independent  
32 crop yield, crop pollination, and biodiversity. Our model reveals trade-offs and  
33 synergies imposed by landscape composition that affect not only the magnitude but also  
34 the stability of ecosystem service delivery. Trade-offs involving crop pollination are  
35 strongly affected by the degree to which crops depend on pollination and by their  
36 relative requirement for pollinator densities. We show conditions for crop production to  
37 increase with biodiversity and decreasing crop area, reconciling farmers' profitability  
38 and biodiversity conservation. Our results further suggest that, for pollination-dependent  
39 crops, management strategies that focus on maximising yield will often overlook its  
40 stability. Given that agriculture has become more pollination-dependent over time, it is  
41 essential to understand the mechanisms driving these trade-offs to ensure food security.

## 42 **Introduction**

43 Human population growth and changes in diet preferences worldwide are generating a  
44 huge demand for food (Godfray et al 2010). To fulfil this increasing demand,  
45 agricultural intensification targets high crop yields. The merits of this approach are  
46 clear: the world annual production of cereals, grains, roots, tubers, pulses and oil crops  
47 has more than doubled, and the proportion of undernourished people in the world has  
48 decreased from 26% to 14% over the past 50 years (FAO 2009, 2011). But yields are no  
49 longer increasing in many major crops (Ray et al 2012) and show saturating responses  
50 to pesticide levels (Gaba et al 2016, Lechenet et al 2017), which suggests that the  
51 benefits of agricultural intensification have plateaued. Furthermore, these benefits have  
52 come at a considerable cost to biodiversity. This is particularly worrying for crops  
53 whose yield depends on ecosystem functions and services, such as pollination, whose  
54 provision has not traditionally been part of management policies (Pywell et al 2015,  
55 Tamburini et al 2016).

56

57 Global agriculture largely depends on animal pollination. It is estimated that 70% of  
58 1,330 tropical crops (Roubik 2015) and 85% of crops in Europe (Williams 1994) benefit  
59 from animal pollination, and that pollinators can increase the production of 75% of the  
60 115 most important crops worldwide (Aizen et al 2009). Although the three major crops  
61 in terms of biomass are independent of animal pollination (wheat, rice, corn), the  
62 cultivated area of pollination-dependent crops is expanding faster than the area of  
63 pollinator-independent crops (Breeze et al 2014, Aizen and Harder 2009). In contrast to  
64 the global increase in pollination-dependent agriculture, abundance and diversity of  
65 wild pollinators are declining worldwide (Goulson et al 2015). Honeybee (and

66 sometimes bumblebee) colonies are used to substitute wild pollinator communities, yet  
67 the pollination services of wild pollinators cannot be compensated by managed bees  
68 because (i) pollinator-dependent crop land grows more rapidly than the stock of, e.g.,  
69 honeybee colonies (Aizen et al 2009), (ii) wild insects usually pollinate crops more  
70 efficiently than honeybees (Garibaldi et al 2013), and (iii) honeybees may depress wild  
71 pollinator densities (Lindström et al 2016). Wild pollinators thus remain fundamental  
72 for agricultural pollination. In agricultural landscapes, the loss of semi-natural habitat is  
73 considered to be the first cause of wild pollinator declines (Kennedy et al 2013,  
74 Bretagnolle & Gaba 2015), as semi-natural elements (e.g. hedgerows, low-managed  
75 grasslands, forest patches) provide foraging, nesting and refuge habitats for pollinator  
76 communities (Kremen et al 2004). This land use change therefore leads to a continuous  
77 decrease of wild pollinator communities (Garibaldi et al 2014).

78

79 Recent studies have reported ecosystem service trade-offs in agroecosystems (Nelson et  
80 al 2009, Allan et al 2015, Sutter & Albrecht 2016). For example, intensive land use  
81 favors provisioning services (e.g. crop production) at the cost of other services (e.g.  
82 pollination). More specifically, increasing crop land at the expense of semi-natural  
83 habitat can largely reduce biodiversity in intensive agricultural landscapes (Allan et al  
84 2014), and this may drive ecosystem service trade-offs through negative effects on  
85 ecosystem services that depend on biodiversity (Cardinale et al 2012). Thus, it may be  
86 impossible to maximize all ecosystem services simultaneously (Bateman et al 2013).  
87 These trade-offs underpin the European Commission's Cost of Policy Inaction project  
88 (Braat and ten Brink 2008) and the land sharing vs land sparing debate (Green et al  
89 2005), a framework that distinguishes between the spatial integration (land sharing) or

90 separation (land sparing) of biodiversity conservation and crop production. A better  
91 understanding of the effects of landscape composition on crop production requires  
92 moving from the traditional single-service approach, whereby crop yield is studied  
93 individually, to a multiple-service framework (Bennett et al 2009), where crop yield and  
94 other services, such as biodiversity and pollination, are investigated simultaneously.

95

96 There is a general consensus that decreasing levels of biodiversity can reduce the  
97 magnitude and stability of ecosystem processes (Cardinale et al 2012, Tilman et al  
98 2006). In intensively-managed agroecosystems, the decline in the diversity of  
99 pollinators associated with the loss of semi-natural habitat can alter not only the  
100 magnitude but also the temporal stability of animal pollination-dependent crop yield,  
101 especially when biodiversity is reduced to the low levels typical of many intensive  
102 agricultural areas (Garibaldi et al 2011a). This means that food security will not be  
103 achieved by high crop yields alone; agricultural practices should also target a stable  
104 provision of crop yield over time, as low crop yield stability can cause unpredictable  
105 negative impacts on food supply and farmer income (Schmidhuber and Tubiello 2007).  
106 Despite the importance of yield stability and the empirical evidence that the magnitude  
107 and stability of ecosystem services do not necessarily co-vary positively (Macfadyen et  
108 al 2011, Gagic et al 2012), there have been few studies on the stability of crop yield.  
109 These studies have generally found that yield stability decreases with agricultural  
110 intensification and crop pollination dependence (Garibaldi et al 2014, 2011a, 2011b;  
111 Deguines et al 2014), but the ecological mechanisms that drive these effects have  
112 received little attention.

113

114 In this study, we develop a model to predict changes in crop yield and biodiversity  
115 along a gradient of landscape composition (i.e. increasing proportions of semi-natural  
116 habitat) in agricultural systems. We focus on three ecosystem services, i.e. pollinator-  
117 independent crop yield (a provisioning service), crop pollination (a regulating or  
118 supporting service), and biodiversity *per se*. We assess the ecosystem service of  
119 pollination by measuring crop production resulting from animal pollination. Whether or  
120 not biodiversity is an ecosystem service in itself is a matter of debate; here, we consider  
121 biodiversity as such because it is directly associated with and drives supporting (e.g.  
122 nutrient cycling, primary production) as well as cultural services. We distinguish  
123 between two additive ecosystem services associated with total crop yield: the yield that  
124 results from wild animal pollination (hereafter crop pollination), and the yield that is  
125 independent from animal pollination (hereafter independent crop yield). This separation  
126 allows us to quantitatively vary the degree of pollination dependence of crops, in  
127 contrast to studies that only make a qualitative distinction between pollination-  
128 dependent and pollinator-independent crops (Ghazoul and Koh 2010). We analyse the  
129 expected biodiversity (i.e. species richness) and the magnitude and stability of crop  
130 pollination and independent crop yield, yielding a total of five ecosystem service  
131 components. We focus on how the relative proportion of semi-natural habitat and crop  
132 land in the agricultural landscape, and crop pollination dependence influence these five  
133 ecosystem service components. Specifically, we address two main questions: (i) What  
134 are the trade-offs between biodiversity and the magnitude and stability of crop  
135 pollination and independent crop yield in agricultural landscapes? and (ii) How do  
136 landscape composition (the relative proportion of semi-natural habitat and crop area in  
137 the agricultural landscape), and crop pollination dependence influence these trade-offs?

138

## 139 **Methods**

140 **Agroecosystem model.** We derive a model for crop biomass production in a spatially  
141 heterogeneous agricultural landscape that incorporates environmental and demographic  
142 stochasticity. Our model has two types of patches: crop land and semi-natural habitat.  
143 Crop land is used to grow annual crops with varying degrees of dependence on wild  
144 animal pollination, whereas semi-natural habitat shelters ‘wild’ plants and pollinators.  
145 This model represents intensively-managed agricultural systems, where crop land does  
146 not host significant levels of biodiversity, allowing spatial heterogeneity to be broadly  
147 defined by two patch types. Pollinators live and nest in semi-natural habitats, yet they  
148 move across the landscape to forage on either crops or ‘wild’ plants, or both. Crop land  
149 and semi-natural habitat are therefore linked by pollinators’ foraging movement. The  
150 three components of our model (pollinators, ‘wild’ plants, and crop yield) are  
151 represented by the following equations:

152

$$153 \quad \frac{dP}{dt} = r_P(t)P(t)\left(1 - \frac{P(t)}{k_P \omega_{sn} A}\right) + \sigma_P^e u_P^e(t)P(t) + \frac{\sigma_P^d u_P^d(t)}{\sqrt{P(t)}}P(t) \quad (1)$$

154

$$155 \quad \frac{dW}{dt} = r_W(t)W(t)\left(1 - \frac{W(t)}{k_W \omega_{sn} A}\right) + \sigma_W^e u_W^e(t)W(t) + \frac{\sigma_W^d u_W^d(t)}{\sqrt{W(t)}}W(t) \quad (2)$$

156

$$157 \quad C(t) = (1 - \omega_{sn})A \left[ Z_C + \frac{\alpha_C [P(t)/A]}{\beta_C + [P(t)/A]} \right] (1 + \sigma_C^e u_C^e(t)) \quad (3)$$

158

159 where  $P$  and  $W$  represent the maximum yearly biomass of pollinators and ‘wild’ plants,  
160 respectively.  $P$  does not take managed honeybees into account as they do not depend on

161 the availability of semi-natural habitat, and they pollinate less efficiently compared to  
162 non-managed pollinators (Garibaldi et al 2013). The model does not consider within-  
163 year dynamics.  $C(t)$  is the amount of crop biomass produced in year  $t$ , i.e. annual crop  
164 yield.  $C(t)$  is not represented by a differential equation because crops are harvested and  
165 their dynamics do not depend on the previous state. Conversely, pollinators and wild  
166 plants are not managed and their actual values depend on previous states.  $k_P$  and  $k_W$  are  
167 the carrying capacities of pollinators and ‘wild’ plants, respectively, per unit area;  $A$  is  
168 the total landscape area (crop land and semi-natural habitat);  $\omega_{sn}$  is the proportion of  
169 semi-natural habitat within the agricultural landscape ( $[1-\omega_{sn}] * A$  is total crop or  
170 agricultural area). The model is spatially implicit, which means that pollinators can  
171 potentially feed on all crops and ‘wild’ plants present in the agricultural landscape,  
172 irrespective of the spatial configuration of the landscape. Hence, this model describes  
173 what happens in agricultural landscapes at the scale determined by the pollinator’s  
174 foraging range (200 meters for small bee species, 25-110 meters for bumble bees, >200  
175 meters for certain bee species (Zurbuchen et al 2010, Geib et al 2015)), which  
176 corresponds roughly to the scale of a typical arable field in Europe.

177

178 In the first two equations,  $r_P(t)$  and  $r_W(t)$  are the pollinators’ and ‘wild’ plants’ per  
179 capita growth rates, and are defined as:

$$r_P(t) = c_P \frac{\alpha_P (\phi_W W(t) + \phi_C C(t))}{\beta_P + \phi_W W(t) + \phi_C C(t)} \quad (4)$$

$$r_W(t) = c_W \frac{\alpha_W (P(t)/A)}{\beta_W + (P(t)/A)} \quad (5)$$

183



184 Pollinators are assumed to be generalist central-place foragers that feed on both ‘wild’  
185 plants and crops (Kleijn et al 2015). We assume that plant and pollinator uptake of  
186 resources follows a saturating, type II functional response, where  $\alpha_P$  and  $\alpha_W$  are the  
187 maximum growth rates;  $\beta_P$  and  $\beta_W$  are half-saturation constants; and  $c_P$  and  $c_W$  are the  
188 conversion rates of pollinators and ‘wild’ plants, respectively, that translate the  
189 functional responses into numerical ones. For simplicity, we set conversion rates equal  
190 to unity. The pollination-dependent part of crop yield is also assumed to follow a type II  
191 functional response, where  $\alpha_C$  is the maximum crop yield derived from pollination,  $\beta_C$  is  
192 the half-saturation constant of crops, and  $\Phi_W$  and  $\Phi_C$  are constants that convert fluxes of  
193 ‘wild’ plants and crops, respectively, to pollinator biomass. We use  $\Phi_W = \Phi_C = 1$  for  
194 simplicity; to allow differences in resource quality of different crop types, we also made  
195  $\Phi_C$  dependent on crop pollination dependence (see below). The use of saturating  
196 functional responses is widely supported and it is consistent with several biological  
197 examples (Thebault & Fontaine 2010, Holland et al 2013, Holland 2015). A complete  
198 description of the model parameters can be found in Table 1.

199  
200 Environmental stochasticity is included through the terms  $\sigma^e u^e(t)$ , where  $(\sigma^e)^2$  is the  
201 environmental variance of either pollinators  $((\sigma_P^e)^2)$ , ‘wild’ plants  $((\sigma_W^e)^2)$  or crops  
202  $((\sigma_C^e)^2)$ , and  $u^e(t)$  are random functions with zero mean and standardized variance, that  
203 can be correlated through time (a good year for plants might also be good for crops).  
204 Demographic stochasticity  $(\sigma^d u^d(t))$  arises from stochastic variation in individuals’  
205 births and deaths. Because crops are sown at high densities, we assume demographic  
206 stochasticity is prevented in crops, and only affects pollinators and ‘wild’ plants.  
207 Demographic stochasticity is included in the form of the first-order normal  
208 approximation commonly used in stochastic population dynamics (Lande et al 2003),

209 where  $(\sigma^d)^2$  is the demographic variance of either pollinators ( $(\sigma_P^d)^2$ ) or ‘wild’ plants  
210 ( $(\sigma_W^d)^2$ ), and  $u^d(t)$  are independent random functions with zero mean and standardized  
211 variance.

212

213 Crops differ greatly in the degree to which animal pollination contributes to yield, from  
214 pollinator-independent crops, such as obligate wind- or self-pollinated species (e.g.  
215 cereals), to fully animal-pollinated species (e.g. fruit trees, oilseed rape). Within animal-  
216 pollinated species, crops differ in their level of dependence on pollination (Klein et al  
217 2007). In our model,  $Z_C$  represents the part of crop yield that is independent of animal  
218 pollination and  $\alpha_C$  is the crop yield derived from pollination, and therefore we can  
219 estimate crop pollination dependence (%) as  $\alpha_C / (\alpha_C + Z_C)$ . If  $Z_C = 0$  ( $\alpha_C > 0$ ), crop yield  
220 depends entirely on animal pollination; conversely, animal pollination-independent  
221 crops are defined by  $\alpha_C = 0$  ( $Z_C > 0$ ). Most fruit and seed crops lie between these two  
222 extremes ( $Z_C > 0$ ,  $\alpha_C > 0$ ). We assume there is no interaction between  $\alpha_C$  and  $Z_C$   
223 (Bartomeus et al 2015, Gils et al 2016).

224

225 **Mean and stability of ecosystem services.** We use our model to quantify biodiversity  
226 and both the mean and the stability of independent crop yield and crop pollination,  
227 which make five ecosystem service components, in intensively-managed agricultural  
228 landscapes with varying proportions of semi-natural habitat. We assume that, at the end  
229 of each cropping season, the amount of animal pollinators, wild plants and crops reach  
230 roughly constant values in the absence of environmental and demographic stochasticity  
231 at the landscape scale, despite local year-to-year changes in those variables. This year-  
232 to-year equilibrium assumption is a reasonable first approximation to a more complex  
233 and dynamical system. We use the species-area relationship (SAR) to estimate changes

234 in biodiversity as a function of semi-natural area. We decided to use SAR for estimating  
235 biodiversity instead of wild plant biomass or pollinator biomass, because species-  
236 biomass relationships are more variable at local/landscape scales such as the one  
237 considered here, and negative relationships have been reported (e.g. diversity-  
238 productivity) (Cardinale et al 2012). Moreover, when biodiversity is considered a  
239 cultural service, it is usually estimated as the number of species. Despite the fact that  
240 SAR is usually stronger at spatial scales larger than that of arable fields, where we  
241 might observe more variation around the average biodiversity values, it captures the  
242 expected mean biodiversity at the scale of an arable field in Europe. We estimated SAR  
243 using the conventional power law function ( $S=c [\omega_{sn} A]^z$ , where  $S$  = number of species,  
244  $c$  is a constant of proportionality). Theoretical models and field data from a wide range  
245 of plant and animal taxa show that the slope,  $z$ , of the logarithm of species richness  
246 against the logarithm of area is roughly constant, with  $z \approx 0.25$  (Crawley and Harral  
247 2001). Given that the equilibrium plant and pollinator biomasses are proportional to the  
248 area of semi-natural area (Appendix S5: Fig. S1), considering either species richness or  
249 biomass would yield the same qualitative results ( $R^2 = 0.90$ ; at the scale of this study,  $z$   
250 can be higher (0.4 or 0.5) (Crawley and Harral 2001), yielding an even stronger  
251 correlation between the number of species and biomass). We assume that crops are  
252 harvested yearly; hence, average crop yield represents the temporal mean of the yearly  
253 averaged crop yield across the agricultural landscape. To account for the stability of  
254 independent crop yield and crop pollination, we use the inverse of temporal variability,  
255 i.e. invariability. Temporal variability is measured as the square of the temporal  
256 coefficient of variation ( $CV^2$ ) of total biomass, i.e. the ratio of the variance to the square  
257 of the mean, and is calculated in the stationary regime around the equilibrium. We use  
258  $1/CV^2$  as a metric of stability (i.e. invariability) of independent crop yield and crop

259 pollination. This measure of ecosystem stability has been used in recent empirical and  
260 experimental studies (Tilman et al 2006, Loreau and De Mazancourt 2013).  
261  
262 The analytical expressions for the equilibrium and variability of pollinator biomass,  
263 wild plant biomass, and crop yield are presented in Appendix S1. A summary of the  
264 equations for the five ecosystem service components can be found in Appendix S2 (Eqs.  
265 S5-S9). Whenever possible, we estimated parameter values with empirical  
266 information. In other cases, we informed parameters with commonly-assigned values  
267 found in the literature (McCann et al 2005, Thompson et al 2006, Leroux and Loreau  
268 2008, Holland and DeAngelis 20010, Thebault and Fontaine 2010, Morales 2011,  
269 Holland et al 2013, Encinas-Viso 2014, Gounand et al 2014). For example, to determine  
270 the carrying capacity of pollinators ( $k_P$ ), we used empirical data on average numbers of  
271 individuals and body mass of wild pollinators (Bommarco et al 2012, Rollin et al 2013,  
272 Holzschuh et al 2016). For wild plants, we used empirical observations to inform their  
273 carrying capacities ( $k_W$ ) (Craven et al 2016). Also, there is information on independent  
274 crop yield that was used to determine  $Z_C$  (e.g. <http://data.worldbank.org/>). We allowed  
275 variation in  $\alpha_C$  and  $\beta_C$  in order to investigate changes in the five ecosystem services  
276 components across the amount of semi-natural habitat ( $\omega_{sn}$ ), the degree of crop  
277 pollination dependence ( $Z_C/\alpha_C$ ), and the crop relative requirement for pollinator  
278 densities ( $\beta_C/k_P$ ). A sensitivity analysis was performed for parameter whose values  
279 could not be determined precisely or for which there was variation in their values  
280 assigned in the literature, e.g.  $\alpha_C$ ,  $\alpha_P$ ,  $Z_C$ ,  $\beta_C$ ,  $\beta_P$ ,  $k_P$  (Appendix S3). The choice of these  
281 parameters for the sensitivity analyses is also justified because they are most relevant  
282 for the estimation of equilibrium biomasses. Sensitivity analysis shows that variations in

283 these parameter values did not change the results qualitatively. Analyses were  
284 performed in R software (R version 3.2.4, R Core Team 2016).

285

286

## 287 **Results**

### 288 *Overall effects of landscape composition on ecosystem service components*

289 Increases in the relative proportion of crop land has contrasting effects on the various  
290 ecosystem services. As expected, biodiversity increases with the proportion of semi-  
291 natural habitat, as the latter provides area for many taxonomic groups, such as wild  
292 plants and pollinators (Figure 1a). Changes in the biomasses of wild plants and  
293 pollinators with semi-natural habitat are positively correlated with changes in  
294 biodiversity ( $R^2 = 0.90$ ; Appendix S5: Fig. S1). The responses of the pollination-  
295 independent and pollination-dependent (i.e. crop pollination) components of crop yield  
296 differ strongly. Independent crop yield decreases linearly with the amount of semi-  
297 natural habitat because crop land decreases and it does not depend on pollinators  
298 (Figure 1c). In contrast, the relationship between crop pollination and the proportion of  
299 semi-natural habitat is hump-shaped (Figure 1b), as a result of the contrasting effects of  
300 semi-natural habitat on pollinators and crop land. That is, a larger amount of semi-  
301 natural habitat increases wild pollinator biomass (Appendix S5: Fig. S1b) but reduces  
302 crop land, which results in a hump-shaped relationship that is robust to changes in  
303 parameter values (Appendix S3). Total crop yield, i.e. pollination-independent plus  
304 pollination-dependent crop yields, displays a similar hump-shaped relationship,  
305 especially when crop pollination dependence is moderate to high (Appendix S5: Fig.  
306 S2). Interestingly, when measured per unit of crop land, crop yield increases with the

307 proportion of semi-natural habitat, because of the beneficial effect of pollination  
308 (Appendix S5: Fig. S3).  
309  
310 The stability of independent crop yield does not change with semi-natural habitat  
311 (Figure 1e) because it does not rely on animal pollination. On the other hand,  
312 pollination-dependent yield does depend on animal pollinators, thus crop pollination  
313 stability strongly depends on the amount of semi-natural habitat (Figure 1d). Crop  
314 stability shows similar trends when measured at landscape scale or per unit of  
315 agricultural area.

316

### 317 ***Role of pollination dependence and crop relative requirement for pollinators***

318 The dependence of crop yield mean and stability on the proportion of semi-natural  
319 habitat is controlled by two *effective* parameter combinations,  $Z_C/\alpha_C$  and  $\beta_C/k_P$   
320 (Appendix S1).  $Z_C$  is the pollinator-independent component of crop yield and  $\alpha_C$  is the  
321 maximum crop yield derived from pollinator interactions, so  $Z_C/\alpha_C$  is inversely related  
322 to crop pollination dependence:

$$323 \text{ Pollination dependence} = \frac{1}{1 + Z_C/\alpha_C}$$

324  $\beta_C/k_P$  is the ratio of crop half-saturation constant relative to pollinators' carrying  
325 capacity, and it quantifies the pollinator requirement of crops relative to the availability  
326 of pollinators, i.e. crop relative requirement for pollinators. For small values of  $\beta_C/k_P$   
327 ( $<1$ ) crop yield saturates at lower pollinator biomass than their carrying capacity, but for  
328 large values of  $\beta_C/k_P$  ( $>1$ ) crop yield saturates at pollinator biomasses much higher than  
329 their carrying capacities.

330

331 Biodiversity is negatively correlated with mean independent crop yield, and is unrelated  
332 to its stability (Figure 1a, c). For increasing levels of pollination dependence, both the  
333 mean and stability of total crop yield are increasingly affected by pollination and hence  
334 by the amount of semi-natural habitat (Figure 2). The position of the maximum yield  
335 along the semi-natural gradient changes with crop pollination dependence and crop  
336 relative requirement for pollinators. On one hand, for higher levels of pollination  
337 dependence crops require more pollinators and thus maximum crop yield is achieved at  
338 larger proportions of semi-natural habitat. On the other hand, high crop relative  
339 requirement for pollinators (high  $\beta_C / k_P$ ) has the dual effect of reducing mean yield and  
340 shifting maximum yield to larger amounts of semi-natural habitat. In general, high crop  
341 relative requirement for pollinators is less responsive to the amount of semi-natural  
342 habitat, because pollinator densities that will be achieved in the agricultural landscape  
343 are unlikely to fulfill crop relative requirement for pollinators (Appendix S4). Mean  
344 crop yield per unit of agricultural area increases with the proportion of semi-natural  
345 habitat (Appendix S5: Fig. S3), although it starts to show some saturation when crop  
346 relative requirement for pollinators is low. Finally we explored the effect of resource  
347 quality of different crop types and showed that these results are robust to differences in  
348 resource quality of different crop types (e.g.  $\Phi_C \sim \alpha_C / (\alpha_C + Z_C)$ ) (Appendix S4).

349

350 In pollination-dependent crops, the stability of pollination also changes with the fraction  
351 of semi-natural habitat: it first decreases (due to the demographic and environmental  
352 stochasticity of pollinators), and then increases after a minimum fraction of semi-natural  
353 habitat has been reached (due to a drop in the response of crops to pollinator  
354 stochasticity), although this response is heavily conditioned by the crop relative  
355 requirement for pollinators (Figure 2e-h; Appendix S4). Whereas a higher pollination

356 dependence of crops reduces pollination stability and broadens the range of stability  
357 values, crops with a lower pollination dependence are little affected by pollinator  
358 stochasticity, and yield stability is mostly determined by the environmental stochasticity  
359 of crops. Within each level of crop pollination dependence (Figure 2) the response of  
360 yield stability to semi-natural habitat is conditioned by crop relative requirement for  
361 pollinators: a low crop relative requirement for pollinators (low  $\beta_C/k_P$ ) shifts the  
362 stability valley to lower fractions of semi-natural habitat, and stability increases faster.  
363 Increasing  $\beta_C/k_P$  expands the region of low stability, and stability requires larger areas  
364 of semi-natural habitat to increase. When crop relative requirement for pollinators is  
365 very high (high  $\beta_C/k_P$ ), crop yield stability decreases monotonically along the full  
366 gradient of semi-natural habitat.

367

368 In sum, the contrasting effects of increasing crop land on the various ecosystem services  
369 reveal trade-offs (negatively correlated responses) and synergies (positively correlated  
370 responses) in the response of biodiversity and the mean and stability of independent  
371 crop yield and crop pollination (Figure 3). The exact shape of the ecosystem service  
372 trade-offs across the gradient of semi-natural habitat is controlled by the degree to  
373 which crops depend on pollination ( $Z_C/\alpha_C$ ) and by their relative requirement for  
374 pollinator densities ( $\beta_C/k_P$ ). Variations in parameter values did not change results  
375 qualitatively.

376

## 377 **Discussion**

378 In intensively-managed agricultural systems, increases in the amount of crop land  
379 relative to that of semi-natural habitat have major consequences for the provision of  
380 multiple ecosystem services. Our model suggests that: (1) changes in landscape



381 composition generate a variety of synergies and trade-offs between biodiversity  
382 conservation, crop pollination and independent crop yield, (2) these trade-offs affect not  
383 only the magnitude but also the stability of these ecosystem services, and (3) the trade-  
384 offs involving crop pollination are strongly affected by the degree to which crops  
385 depend on pollination and by their relative requirement for pollinator biomass.

386

387 The loss of semi-natural habitat has contrasting effects on the three ecosystem services  
388 considered: biodiversity decreases, independent crop production increases, while  
389 pollination-dependent crop production is maximized at an intermediate proportion of  
390 semi-natural habitat. These results provide rigorous theoretical foundations for  
391 previously hypothesized functional relationships between the magnitude of ecosystem  
392 services and landscape composition (Braat and ten Brink 2008). The results further  
393 suggest that the exact shape of the hump-shaped relationship between provisioning  
394 services and semi-natural habitat is determined by the pollination dependence and the  
395 relative requirement of crops for pollinator densities (Figure 2, 3). Greater values of  
396 these two factors increase the effect of pollinator biomass on total crop yield, and thus  
397 the maximum yield is achieved at higher fractions of semi-natural habitat.

398

399 Importantly, our results suggest that landscape composition also imposes trade-offs on  
400 the stability of crop yield. These trade-offs are driven by mechanisms associated with  
401 the stochasticity of pollinators and the response of crops to that stochasticity. On the  
402 one hand, the stability of crop pollination decreases with the amount of semi-natural  
403 habitat when the latter is small because pollinator stochasticity increases. For larger  
404 proportions of semi-natural habitat, however, the response of crop yield to pollinator  
405 stochasticity drops, with varying effects on pollination stability. The decay in crop

406 response to pollinator stochasticity is caused by the saturation of pollination-dependent  
407 crop yield to pollinator biomass (Appendix S4). Crop relative requirement for  
408 pollinators controls how fast saturation sets in and, consequently, how fast the response  
409 of crops to pollinator stochasticity drops down.

410

411 Taken together, the responses of the mean and stability of ecosystem services to  
412 landscape composition produce different patterns across the gradient of semi-natural  
413 habitat, from trade-offs (negatively correlated responses) to synergies (positively  
414 correlated responses) (Figure 3). At the landscape scale, we found a trade-off between  
415 independent mean crop yield and biodiversity, and between crop pollination and  
416 independent crop yield when semi-natural habitat is low. Conversely, at low fractions of  
417 semi-natural habitat, we observed a synergy between crop pollination and biodiversity.  
418 Such synergy between crop production and biodiversity also became apparent when  
419 considering crop production per unit of agricultural area, revealing the possibility to  
420 reconcile farmers' profitability (at field scale) and biodiversity conservation (at  
421 landscape scale). Trade-offs and synergies can also occur within ecosystem services,  
422 e.g. crop pollination mean and its stability co-vary negatively except at low-to-  
423 intermediate amounts of semi-natural habitat. These patterns give moderate support to  
424 the intermediate landscape-complexity hypothesis (Tscharrntke et al 2012), which states  
425 that the effectiveness of agro-environmental management strategies is higher in simple  
426 (1-20% non-crop area) than in either cleared (<1% non-crop area) or complex (>20%  
427 non-crop area) landscapes. For moderate-to-high levels of crop pollination dependence  
428 and high crop relative requirement for pollinators, increases in the amount of semi-  
429 natural habitat benefit biodiversity and crop pollination both in terms of average  
430 provision and stability in simple landscapes. Despite simple agricultural landscapes are

431 often areas where cultivated crops have a low degree pollination dependency (except  
432 from species like oilseed rape and sunflower), these benefits are also larger in simple  
433 landscapes when crop yield per unit of agricultural land is considered. Surprisingly  
434 though, with a few exceptions (e.g. Dufлот et al 2015), most intensively-managed  
435 agricultural landscapes show very low proportions of semi-natural habitat (<5%;  
436 Öckinger and Smith 2007, Henckel et al 2015). Additionally, increasing in the amount  
437 of semi-natural habitat benefits other services such as pest control (Sutter and Albrecht  
438 2016). In sum, consistent with empirical observations (Pywell et al 2015, Tamburini et  
439 al 2016), the existing trade-offs and synergies suggest that moderate increases in the  
440 amount of semi-natural habitat in simple agricultural landscapes (1-20% non-crop area)  
441 allow ecosystem services essential for crop production to be maintained, which in turn  
442 increases the magnitude and stability of crop yield.

443

444 Our findings are also consistent with recent studies suggesting that the interaction  
445 between agricultural intensification and the level of pollination dependence of crops  
446 determines the stability of crop production at large spatial scales. For instance, using an  
447 intensification index that includes the amount of semi-natural habitat in agroecosystems,  
448 a recent study found that the stability of the yield of the 54 major crops in France  
449 decreases in more intensive agriculture, and that this reduction is more pronounced for  
450 higher crop pollination dependence (Deguines et al 2014). Similarly, long-term data  
451 from FAO suggest that a greater pollination dependence of crops leads to lower and less  
452 stable crop yields (Garibaldi et al 2011a). By considering multiple inter-related  
453 ecosystem services simultaneously, our results add a mechanistic understanding of these  
454 ecosystem service trade-offs in intensively-managed agroecosystems.

455

456 The trade-offs in ecosystem service provision revealed by our model have two major  
457 implications for the management of intensive agricultural systems. First, the effects of  
458 biodiversity loss on crop production that result from agricultural intensification depend  
459 on the level of pollination dependence of crops. Whereas in pollinator-independent  
460 agriculture reductions in biodiversity and crop pollination have no effect on  
461 provisioning services (crop production), for pollination-dependent agriculture crop  
462 production relies on biodiversity (e.g. wild plants provide foraging, nesting and refuge  
463 for pollinators), and the trade-off between biodiversity conservation and crop  
464 production is mediated by biodiversity loss. Such reduction in biodiversity reduces the  
465 delivery of regulating services, and this has a direct negative effect not only on mean  
466 yield but also on its stability. Secondly, our results suggest that simultaneously  
467 maximizing crop yield mean and stability is often impossible for pollination-dependent  
468 crops, and therefore, management strategies that focus on maximising mean yield will  
469 overlook its stability. Specifically, enhancing crop yield by increasing crop land would  
470 be counterproductive for pollination-dependent crops, at least below a threshold of  
471 semi-natural habitat. There is, however, a notable exception to this: maximization of  
472 crop yield mean (both at the landscape scale and per unit of agricultural area) and crop  
473 yield stability can be achieved at 20-40% of semi-natural habitat when crops show  
474 intermediate-to-high degrees of animal pollination dependence and crop relative  
475 requirement for pollinators is low.

476

477 The yield mean and stability of crops with greater pollinator dependence has  
478 continuously decreased from 1961 to 2008 (Garibaldi et al 2011a). This suggests that  
479 the relative requirement for pollinators of many world crops is high, as pesticide use has  
480 diminished the carrying capacity of pollinators in semi-natural habitat during the same

481 period of time (Goulson et al 2015). To compensate for low crop yields agricultural  
482 policies have promoted land cultivation of pollination-dependent crops and the use of  
483 managed honeybee colonies, which are not affected by semi-natural habitat. However,  
484 these measures reduce the amount of semi-natural area and honeybees cannot  
485 compensate for the pollination services of non-managed, wild pollinators (Aizen et al  
486 2009, Garibaldi et al 2013). Our model suggests that an alternative to agricultural  
487 intensification consists in diminishing crop relative requirement for pollinators with  
488 practices that increase the carrying capacity of pollinators in semi-natural habitat, such  
489 as higher farmland heterogeneity and floral assemblages, increasing nesting  
490 opportunities, and reductions in the use of synthetic pesticides (Garibaldi et al 2014).  
491 These measures may not only increase mean crop yield at the landscape scale or per unit  
492 of agricultural area, but also its stability.

493

494 Our model has several limitations. For example, our model and the observed trade-offs  
495 between biodiversity and crop yield refer to intensively-managed agricultural systems,  
496 where crop land does not host important biodiversity levels; however, these trade-offs  
497 are not necessarily similar in non-intensive agricultural systems where biodiversity can  
498 moderately thrive within crop land (Clough et al 2011). Second, the species-area  
499 relationship is stronger at spatial scales larger than that of arable fields, where we might  
500 expect more variation around the expected biodiversity values; yet, our simple model  
501 captures the expected mean biodiversity at the scale of an arable field in Europe.

502 Besides, the observation that biodiversity loss has either none (stability) or positive  
503 (mean) effects on independent crop yield is based on the species-area relationship; these  
504 effects are likely to differ if taxonomic groups responsible for other ecosystem services,  
505 i.e. pest control, are more specifically included. Also, our model is spatially-implicit,

506 and does not consider the effects of the spatial configuration of semi-natural habitat  
507 (Garibaldi et al 2011b, Mitchell et al 2015); future studies should consider space  
508 explicitly, as the spatial distribution of semi-natural habitat within the agricultural  
509 landscape determines the ecosystem service flows between semi-natural habitat and  
510 crop land, including pollination (Brosi et al 2008, Keitt 2009, Serna-Chavez et al 2014).  
511 Finally, we find that the amount of semi-natural habitat has no effect on the stability of  
512 independent crop yield. This may change, however, if environmental stochasticity of  
513 crops increases with decreasing amounts of semi-natural habitat, as suggested by studies  
514 linking semi-natural habitat to climate regulation, natural hazard regulation and water  
515 flow regulation services (Harrison et al 2010). Despite these limitations, our model is a  
516 very useful first step as it successfully reproduces the results of recent empirical studies  
517 on the stability of pollination-dependent crop yield and it provides a mechanistic  
518 understanding of the trade-offs that are relevant in intensively-managed  
519 agroecosystems.

520

## 521 **Conclusions**

522 Although historically the demand for increased crop production has been satisfied by  
523 agricultural practices that promote land conversion to crop land and improvements in  
524 crop yield (e.g. fertilizers, pesticides, selection of high-yield crop strains), the benefits  
525 of this approach have started to be challenged. The present study sheds new light on this  
526 debate. Our model suggests that landscape composition imposes trade-offs on several  
527 ecosystem services in intensively-managed agroecosystems. These trade-offs not only  
528 affect the mean production of crops, but also their temporal stability, in such a way that  
529 high and stable crop yields are not necessarily associated. This suggests that an  
530 approach that simultaneously considers the magnitude and stability of multiple

531 ecosystem services is needed to understand and better manage agricultural systems. In  
532 order to develop a more efficient agriculture and ensure food security, it is essential to  
533 understand the mechanisms driving the trade-offs between multiple ecosystem services.  
534

## 535 **Acknowledgements**

536 DM was funded by the EU and INRA in the framework of the Marie-Curie FP7  
537 COFUND People Program, through the award of an AgreenSkills/AgreenSkills+  
538 fellowship. This work was supported by the TULIP Laboratory of Excellence (ANR-10-  
539 LABX-41), by the ANR AGROBIOSE (ANR-13-AGRO-0001), ERANET ECODEAL,  
540 and by the BIOSTASES Advanced Grant, funded by the European Research Council  
541 under the European Union's Horizon 2020 research and innovation program (grant  
542 agreement No 666971). The authors thank the Centre for Biodiversity Theory and  
543 Modelling (CBTM) laboratory members for helpful discussion



## 544 **List of references**

- 545 - Aizen M. A., Garibaldi L. A., Cunningham S. A., and Klein A. M. 2009. How much  
546 does agriculture depend on pollinators? Lessons from long-term trends in crop  
547 production. *Annals of Botany (London)* 103:1579–1588.
- 548 - Aizen M. A. and Harder L. D. 2009. The global stock of domesticated honey bees is  
549 growing slower than agricultural demand for pollination. *Current Biology* 19(11):915–  
550 918.
- 551 - Allan E., et al. 2014. Interannual variation in land-use intensity enhances grassland  
552 multidiversity. *Proceeding of the National Academy of Sciences USA* 111:308–313.
- 553 - Allan E., et al. 2015. Land-use intensification alters ecosystem multifunctionality via  
554 loss of biodiversity and changes to functional composition. *Ecology Letters* 18:834-  
555 843.
- 556 - Bartomeus I., Gagic V., and Bommarco R. 2015. Pollinators, pests and soil properties  
557 interactively shape oilseed rape yield. *Basic and Applied Ecology* 16:737–745.
- 558 - Bateman I. J., et al. 2013. Bringing Ecosystem Services into Economic Decision-  
559 Making: Land Use in the United Kingdom. *Science* 341:45-50.
- 560 - Braat L., and ten Brink P. (eds.) 2008. The Cost of Policy Inaction (COPI): The case  
561 of not meeting the 2010 biodiversity target. Alterra Wageningen University and  
562 Research; Institute for European Environmental Policy (IIEP); Ecologic; Fondazione  
563 Eni Enrico Mattei (FEEM); GHK; Milieu en Natuurplanbureau; United Nations  
564 Environmental Programme - World Conservation Monitoring Centre; Witteveen en  
565 Bos, Wageningen / Brussels, commissioned. ISBN: ENV.G.1/ETU/2007/0044.
- 566 - Bennett E. M., Peterson G. D., and Gordon L. J. 2009. Understanding relationships  
567 among multiple ecosystem services. *Ecology Letters* 12:1-11.

- 568 - Bommarco R., Kleijn D., and Potts S. G. 2012. Insect pollination enhances seed yield,  
569 quality, and market value in oilseed rape. *Oecologia* 169:1025-1032.
- 570 - Breeze T. D., Vaissière B. E., Bommarco R., Petanidou T., Seraphides N., Kozák L.,  
571 Scheper J., Biesmeijer J. C., Kleijn D., and Gyldenkerne S. 2014. Agricultural  
572 policies exacerbate honeybee pollination service supply-demand mismatches across  
573 Europe. *PLoS ONE* 9(1):e82996.
- 574 - Bretagnolle V., and Gaba S. 2015. Weeds for bees? A review. *Agronomy for*  
575 *Sustainable Development* 35:891-909.
- 576 - Brosi B. J., Armsworth P. R., and Daily G. C. 2008. Optimal design of agricultural  
577 landscapes for pollination services. *Conservation Letters* 1:27-36.
- 578 - Cardinale B. J., et al. 2012. Biodiversity loss and its impact on humanity. *Nature*  
579 486:59–67.
- 580 - Clough Y., et al. 2011. Combining high biodiversity with high yields in tropical  
581 agroforests. *Proceeding of the National Academy of Sciences USA* 108:8311-8316.
- 582 - Craven D., et al. 2016. Plant diversity effects on grassland productivity are robust to  
583 both nutrient enrichment and drought. *Proceedings of the Royal Society of London B*  
584 283:20150277.
- 585 - Crawley M. J., and Harral J. E. 2001. Scale dependence in plant biodiversity. *Science*  
586 291:864-868.
- 587 - Deguines N., Jono C., Baude M., Henry M., Julliard R., and Fontaine C. 2014. Large-  
588 scale trade-off between agricultural intensification and crop pollination services.  
589 *Frontiers in Ecology and Environment* 12:212-217.
- 590 - Dufлот R., Aviron S., Ernoult A., Fahrig L., and Burel F. 2015. Reconsidering the role  
591 of 'semi-natural habitat' in agricultural landscape biodiversity: a case study.  
592 *Ecological Research* 30:75-83.

- 593 - Encinas-Viso F., Revilla T. A., and Etienne R. S. 2014. Shifts in pollinator population  
594 structure may jeopardize pollination service. *Journal of Theoretical Biology* 352:24-  
595 30.
- 596 - FAO 2009. *The State of Food Insecurity in the World: Economic crises – impacts and*  
597 *lessons learned*. Rome.
- 598 - FAO 2011. FAOSTAT statistical database ([http:// faostat.fao.org/](http://faostat.fao.org/)).
- 599 - Gaba S., Gabriel E., Chadœuf J., Bonneau F., and Bretagnolle V. 2016. Herbicides do  
600 not ensure for higher wheat yield, but eliminate rare plant species. *Scientific Reports*  
601 6:30112.
- 602 - Gagic V., Hänke S., Thies C., Scherber C., Tomanović Ž., and Tschardt T. 2012.  
603 *Agricultural intensification and cereal aphid-parasitoid-hyperparasitoid food webs:*  
604 *network complexity, temporal variability and parasitism rates*. *Oecologia* 170:1099-  
605 1109.
- 606 - Garibaldi L. A., Aizen M. A., Klein A. M., Cunningham S. A., and Harder L. D.  
607 2011a. Global growth and stability of agricultural yield decrease with pollinator  
608 dependence. *Proceeding of the National Academy of Sciences USA* 108:5909-5914.
- 609 - Garibaldi L. A., et al. 2011b. Stability of pollination services decreases with isolation  
610 from natural areas despite honey bee visits. *Ecology Letters* 14:1062-1072.
- 611 - Garibaldi L. A., et al. 2013. Wild pollinators enhance fruit set of crops regardless of  
612 honey bee abundance. *Science* 339:1608–1611.
- 613 - Garibaldi L. A., et al. 2014. From research to action: enhancing crop yield through  
614 wild pollinators. *Frontiers in Ecology and Environment* 12:439–447.
- 615 - Geib J. C., Strange J. P., and Galen J. C. 2015. Bumble bee nest abundance, foraging  
616 distance, and host-plant reproduction: implications for management and conservation.  
617 *Ecological Applications* 25:768-778.

- 618 - Ghazoul J., and Koh L. P. 2010. Food security not (yet) threatened by declining  
619 pollination. *Frontiers in Ecology and Environment* 8:9–10.
- 620 - Gils S., van der Putten W. H., and Kleijn D. 2016. Can above-ground ecosystem  
621 services compensate for reduced fertilizer input and soil organic matter in annual  
622 crops? *Journal of Applied Ecology* 53:1186-1194.
- 623 - Godfray H.-J., Beddington J. R., Crute I. R., Haddad L., Lawrence D., Muir J. F.,  
624 Pretty J., Robinson S., Thomas S. M., and Toulmin C. 2010. Food security: the  
625 challenge of feeding 9 billion people. *Science* 327:812–818.
- 626 - Goulson D., Nicholls E., Botías C., and Rotheray E. L. 2015. Bee declines driven by  
627 combined stress from parasites, pesticides, and lack of flowers. *Science* 347 (6229):  
628 1255957.
- 629 - Gounand I., Mouquet N., Canard E., Guichard F., Hauzy C., and Gravel D. 2014. The  
630 paradox of enrichment in metaecosystems. *American Naturalist* 184:752-763.
- 631 - Green R. E., Cornell S. J., Scharlemann J. P. W., and Balmford A. 2005. Farming and  
632 the Fate of Wild Nature. *Science* 307:550–555.
- 633 - Harrison P. A., et al. 2010. Identifying and prioritizing services in European terrestrial  
634 and freshwater ecosystems. *Biodiversity Conservation* 19:2791-2821.
- 635 - Henckel L., Börger L., Meiss H., Gaba S., and Bretagnolle V. 2015. Organic fields  
636 sustain weed metacommunity dynamics in farmland landscapes. *Proceedings of the*  
637 *Royal Society of London B* 282:20150002.
- 638 - Holland J. N., and DeAngelis D. L. 2010. A consumer-resource approach to the  
639 density-dependent population dynamics of mutualism. *Ecology* 91:1286-1295.
- 640 - Holland J. N., Wang Y., Sun Shan, DeAngelis D. L. 2013. Consumer–resource  
641 dynamics of indirect interactions in a mutualism–parasitism food web module.  
642 *Theoretical Ecology* 6:475-493.

- 643 - Holland J. N. 2015. Population ecology of mutualism. In: Mutualism (Ed: Judith  
644 Bronstein). Oxford University Press, Oxford.
- 645 - Holzschuh A., et al. 2016. Mass-flowering crops dilute pollinator abundance in  
646 agricultural landscapes across Europe. *Ecology Letters* 19:1228-1236.
- 647 - Keitt T. H. 2009. Habitat conversion, extinction thresholds and pollination services in  
648 agroecosystems. *Ecological Applications* 19:1561-1573.
- 649 - Kennedy C. M., et al. 2013. A global quantitative synthesis of local and landscape  
650 effects on wild bee pollinators in agroecosystems. *Ecology Letters* 16:584–599.
- 651 - Kleijn D., et al. 2015. Delivery of crop pollination services is an insufficient argument  
652 for wild pollinator conservation. *Nature Communications* 6:7414.
- 653 - Klein A.-M., Vaissière B. E., Cane J. H., Steffan-Dewenter I., Cunningham S. A.,  
654 Kremen C., and Tscharntke T. 2007. Importance of pollinators in changing landscapes  
655 for world crops. *Proceedings of the Royal Society of London B* 274:303–313.
- 656 - Kremen C., Williams N. M., Bugg R. L., Fay J.P., and Thorp R. W. 2004. The area  
657 requirements of an ecosystem service: crop pollination by native bee communities in  
658 California. *Ecology Letters* 7:1109-1119.
- 659 - Lande R., Engen S., and Saether B.-E. 2003. *Stochastic Population Dynamics in*  
660 *Ecology and Conservation*. Oxford University Press, Oxford.
- 661 - Lechenet M., Dessaint F., Py G., Makowski D., and Munier-Jolain N. 2017. Reducing  
662 pesticide use while preserving crop productivity and profitability on arable farms.  
663 *Nature Plants* 3:17008.
- 664 - Leroux S. J., and Loreau M. 2008. Subsidy hypothesis and strength of trophic  
665 cascades across ecosystems. *Ecology Letters* 11:1147-1156.

- 666 - Lindström S. A. M., Herbertsson L., Rundölf M., Bommarco R., and Smith H. G.  
667 2016. Experimental evidence that honeybees depress wild insect densities in a  
668 flowering crop. *Proceedings of the Royal Society of London B* 283:20161641.
- 669 - Loreau M., and de Mazancourt C. 2013. Biodiversity and ecosystem stability: a  
670 synthesis of underlying mechanisms. *Ecology Letters* 16:106-115.
- 671 - Macfadyen S., Craze P. G., Polaszek A., van Achterberg K., and Memmott J. 2011.  
672 Parasitoid diversity reduces the variability in pest control services across time on  
673 farms. *Proceedings of the Royal Society of London B* 278:3387-3394.
- 674 - McCann K. S., Rasmussen J. B., and Umbanhowar J. 2005. The dynamics of spatially  
675 coupled food webs. *Ecology Letters* 8:513-523.
- 676 - Mitchell M. G. E., Bennett E. M., and Gonzalez A. 2015. Strong and non-linear effects  
677 of fragmentation on ecosystem service provision at multiple scales. *Environmental*  
678 *Research Letters* 10:094014.
- 679 - Morales M. A. 2011. Model selection analysis of temporal variation in benefit for an  
680 ant-tended treehopper. *Ecology* 92:709-719.
- 681 - Nelson, E., et al. 2009. Modeling multiple ecosystem services, biodiversity  
682 conservation, commodity production, and tradeoffs at landscape scales. *Frontiers in*  
683 *Ecology and Environment* 7(1):4-11.
- 684 - Öckinger E., and Smith H. G. 2007. Semi-natural grasslands as population sources for  
685 pollinating insects in agricultural landscapes. *Journal of Applied Ecology* 44:50–59.
- 686 - Pywell R. F., Heard M. S., Woodcock B.A., Hinsley S., Ridding L., Nowakowski M.,  
687 and Bullock J. M. 2015. Wildlife-friendly farming increases crop yield: evidence for  
688 ecological intensification. *Proceedings of the Royal Society of London B*  
689 282:20151740.

- 690 - Ray D. K., Ramankutty N., Mueller N. D., West P. C., and Foley J.A. 2012. Recent  
691 patterns of crop yield growth and stagnation. *Nature Communications* 3:1293.
- 692 - R Core Team. 2016. R: A language and environment for statistical computing. R  
693 Foundation for Statistical Computing, Vienna, Austria
- 694 - Rollin O., Bretagnolle V., Decourtye A., Aptel J., Michel N., Vaissiere B. E., and  
695 Henry M. 2013. Differences of floral resource use between honeybees and wild bees  
696 in an intensive farming system. *Agriculture, Ecosystems and Environment* 179:78-  
697 86.
- 698 - Roubik D. W. 2015. *Pollination of Cultivated Plants in the Tropics*. Agricultural  
699 Services Bulletin 118. Rome: Food and Agriculture Organization.
- 700 - Schmidhuber J., and Tubiello F. N. 2007. Global food security under climate change.  
701 *Proceeding of the National Academy of Sciences USA* 104:19703–19708.
- 702 - Serna-Chavez H. M., Schulp C. J. E., van Bodegom P. M., Bouten W., Verburg P. H.,  
703 and Davidson M. D. 2014. A quantitative framework for assessing spatial flows of  
704 ecosystem services. *Ecological Indicators* 39:24-33.
- 705 - Sutter L., and Albrecht M. 2016. Synergistic interactions of ecosystem services:  
706 florivorous pest control boosts crop yield increase through insect pollination.  
707 *Proceedings of the Royal Society of London B* 283:20152529.
- 708 - Tamburini G., De Simone S., Sigura M., Boscutti F., and Marini L. 2016. Soil  
709 management shapes ecosystem service provision and trade-offs in agricultural  
710 landscapes. *Proceedings of the Royal Society of London B* 283:20161369.
- 711 - Thebault E., and Fontaine C. 2010. Stability of ecological communities and the  
712 architecture of mutualistic and trophic networks. *Science* 329:853-856.
- 713 - Thompson A. R., Nisbet R. M., and Schmitt R. J. 2006. Dynamics of mutualist  
714 populations that are demographically open. *Journal of Animal Ecology* 75:1239-1251.

- 715 - Tilman D., Reich P. B., and Knops J. M. H. 2006. Biodiversity and ecosystem stability  
716 in a decade-long grassland experiment. *Nature* 441:629-632.
- 717 - Tschamntke T., et al. 2012. Landscape moderation of biodiversity patterns and  
718 processes – eight hypotheses. *Biological Reviews* 87:661-685.
- 719 - Williams I. H. 1994. The dependence of crop production within the European Union  
720 on pollination by honey bees. *Agricultural Zoology Reviews* 6:229–257.
- 721 - Zurbuchen A., Landert L., Klaiber J., Müller A., Hein S., and Dorn S. 2010.  
722 Maximum foraging ranges in solitary bees: only few individuals have the capability to  
723 cover long foraging distances. *Biological Conservation* 143:669–76.



724 **Table 1.** Parameters and variables of the model

725

| Parameters<br>& Variables | Definition                                                                  | Dimensions              |
|---------------------------|-----------------------------------------------------------------------------|-------------------------|
| Parameters                |                                                                             |                         |
| $\alpha_P$                | Maximum growth rate of pollinators                                          | time <sup>-1</sup>      |
| $\alpha_W$                | Maximum growth rate of semi-natural plants                                  | time <sup>-1</sup>      |
| $\alpha_C$                | Maximum crop yield derived from pollinator interactions                     | mass·area <sup>-1</sup> |
| $\beta_P$                 | Half-saturation constant of pollinators                                     | mass                    |
| $\beta_W$                 | Half-saturation constant of ‘wild’ plants                                   | mass·area <sup>-1</sup> |
| $\beta_C$                 | Half-saturation constant of crop plants to pollinators                      | mass·area <sup>-1</sup> |
| $k_P$                     | Carrying capacity of pollinators per unit area                              | mass·area <sup>-1</sup> |
| $k_W$                     | Carrying capacity of semi-natural plants per unit area                      | mass·area <sup>-1</sup> |
| $A$                       | Total landscape area                                                        | area                    |
| $\omega_{sn}$             | Proportion of semi-natural habitat                                          | dimensionless           |
| $Z_C$                     | Crop yield independent of pollinators                                       | mass·area <sup>-1</sup> |
| $c_W$                     | Conversion rate of ‘wild’ plants<br>(from functional to numerical response) | dimensionless           |
| $c_P$                     | Conversion rate of pollinators<br>(from functional to numerical response)   | dimensionless           |
| $\Phi_W$                  | Weighting factor for ‘wild’ plants (flux to stock)                          | dimensionless           |
| $\Phi_C$                  | Weighting factor for crop plants (flux to stock)                            | dimensionless           |
| $r_P$                     | Intrinsic growth rate of pollinators                                        | time <sup>-1</sup>      |
| $r_W$                     | Intrinsic growth rate of ‘wild’ plants                                      | time <sup>-1</sup>      |

|                |                                                                                                                                                                       |                                           |
|----------------|-----------------------------------------------------------------------------------------------------------------------------------------------------------------------|-------------------------------------------|
| $\sigma_P^e$   | Environmental standard deviation of pollinators                                                                                                                       | time <sup>-1/2</sup>                      |
| $\sigma_W^e$   | Environmental standard deviation of ‘wild’ plants                                                                                                                     | time <sup>-1/2</sup>                      |
| $\sigma_C^e$   | Environmental standard deviation of crop production                                                                                                                   | dimensionless                             |
| $\sigma_P^d$   | Demographic standard deviation of pollinators                                                                                                                         | mass <sup>1/2</sup> ·time <sup>-1/2</sup> |
| $\sigma_W^d$   | Demographic standard deviation of semi-natural plants                                                                                                                 | mass <sup>1/2</sup> ·time <sup>-1/2</sup> |
| $u_P^e, u_P^d$ | White noise signals with zero mean and standardized variance. $u^e$ = environmental, $u^d$ = demographic<br>$P$ = pollinators; $W$ = ‘wild’ plants; $C$ = crop plants | dimensionless                             |
| $u_W^e, u_W^d$ |                                                                                                                                                                       |                                           |
| $u_C^e, u_C^d$ |                                                                                                                                                                       |                                           |

---

Variables

|        |                                          |      |
|--------|------------------------------------------|------|
| $C(t)$ | Biomass of crop plants (crop yield)      | mass |
| $W(t)$ | Biomass of semi-natural or ‘wild’ plants | mass |
| $P(t)$ | Biomass of pollinators                   | mass |

---

726

727

**Figure 1.** Mean and stability of five ecosystem service components in agroecosystems.

This graph shows the expected biodiversity (a) and the temporal mean (c) and stability (d;  $\log[1/CV^2]$ ) of independent crop yield, and crop pollination (b, d), as functions of the proportion of semi-natural habitat, for different crop relative requirement for pollinators ( $\beta_C/k_P$ ). Because  $\beta_C/k_P$  does not affect biodiversity and the mean/stability of independent crop yield, a single line is showed. Picture of an intensive agricultural landscape in the LSTER Zone Atelier Plaine & Val de Sèvre, France (Photo credit: Sabrina Gaba).

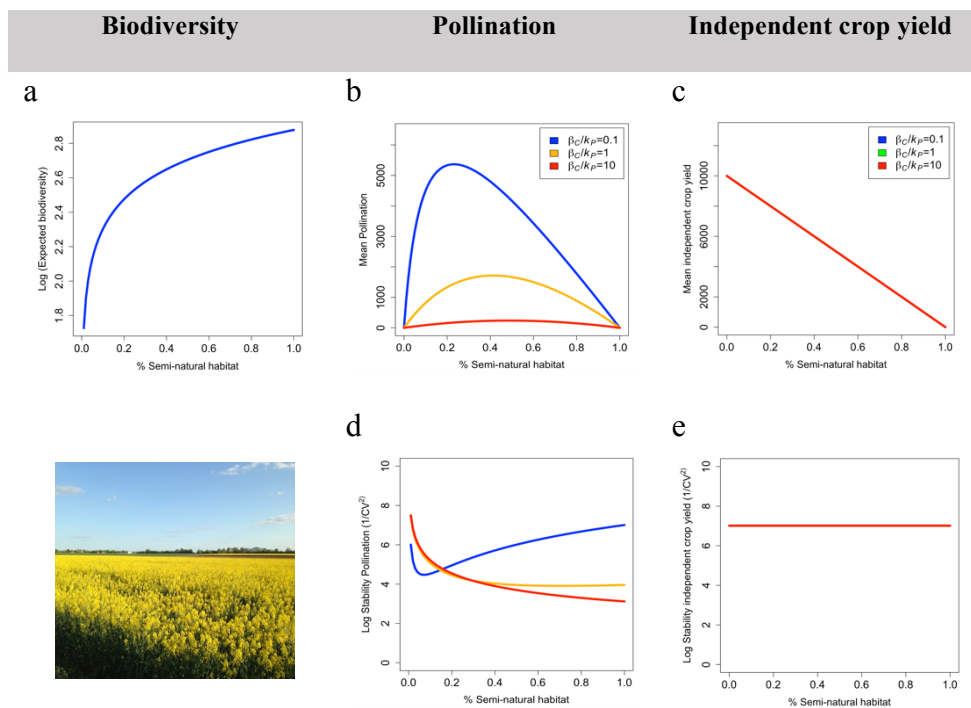

(Parameter values:  $\alpha_p = 0.9$ ,  $\beta_p = 0.6$ ,  $A = 10$ ,  $Z_C = 1000$ ,  $\alpha_C = 1000$ ,  $k_W = 5000$ ,  $k_P = 0.1$ ,  $\sigma_p^c = 0.8$ ,  $\sigma_p^d = 0.1$ ,  $\sigma_C^c = 0.03$ ,  $\alpha_C = 1000$ , Pollination dependence = 50%; Species-area relationship [ $S=c(\omega_{sn}A)^z$ ]:  $c=10$ ,  $z=0.25$ )

**Figure 2.** Mean and stability of total crop yield. Temporal mean and stability

( $\log[1/CV^2]$ ) of total crop yield as functions of pollination dependence and crop relative requirement for pollinators. In (a, e), the three curves overlap.

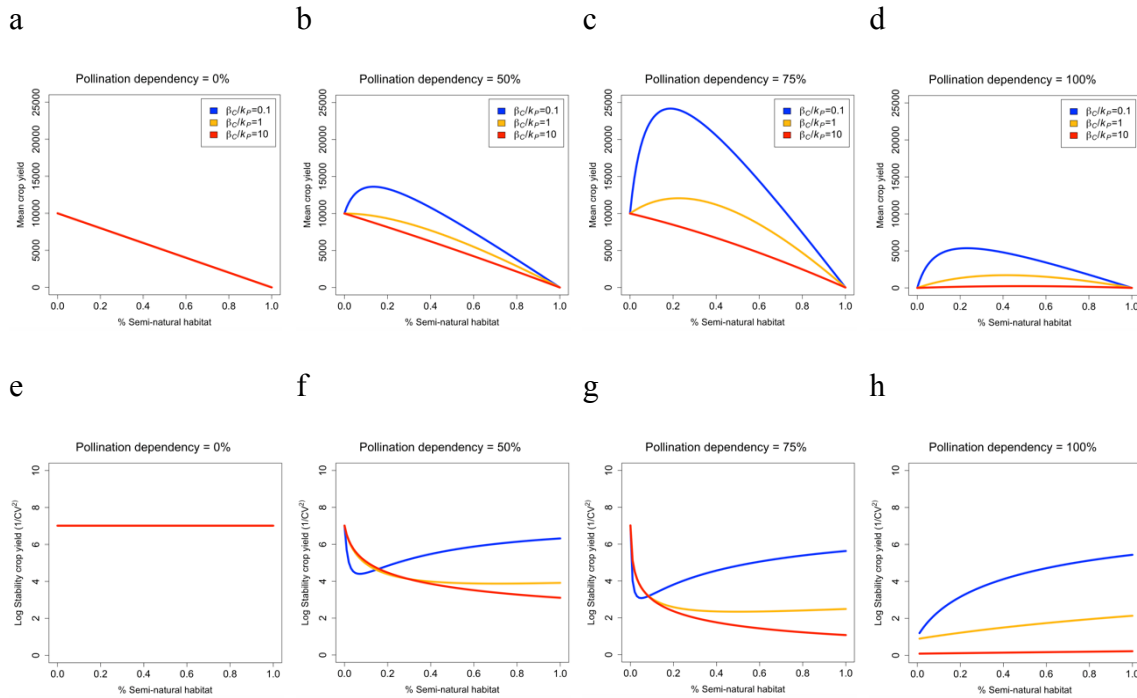

(Parameter values:  $\alpha_p = 0.9$ ,  $\beta_p = 0.6$ ,  $A = 10$ ,  $k_W = 5000$ ,  $\sigma_p^e = 0.8$ ,  $\sigma_p^d = 0.1$ ,  $\sigma_C^e = 0.03$ ,  $\alpha_C = 1000$ .)

Because  $Z_C = 1000$ ,  $\alpha_C$  is allowed to increase with higher pollination dependences; this is why mean crop yield increases with pollination dependence of crops. In a, e:  $\alpha_C = 0$  and  $Z_C = 1000$ . In d, h:  $\alpha_C = 1000$  and  $Z_C = 0$ )

1 **Figure 3.** A variety of trade-offs and synergies between ecosystem service components  
 2 in agroecosystems. This graph shows the expected biodiversity and the temporal mean  
 3 and stability ( $\log[I/CV^2]$ ) of independent crop yield (**a**), and crop pollination (**b**, **c**), as  
 4 functions of the proportion of semi-natural habitat. The responses of the mean and  
 5 stability of the three ecosystem services to increasing proportions of semi-natural  
 6 habitat produce different patterns across the gradient of semi-natural habitat, from trade-  
 7 offs (negatively correlated responses: opposite arrows) to synergies (positively  
 8 correlated responses: similar arrows). Independent crop yield and biodiversity (**a**) are  
 9 not affected by crop relative requirement for pollinators ( $\beta_C/k_P$ ). Conversely, crop  
 10 pollination mean and its stability, and therefore ecosystem service synergies and trade-  
 11 offs, are controlled by crop relative requirement for pollinators: (**b**)  $\beta_C/k_P = 0.1$ , (**c**)  $\beta_C/k_P$   
 12  $/k_P = 1$  (see main text and Supplementary Methods 1). Y axes are unit-less to make  
 13 comparison between curves clearer.

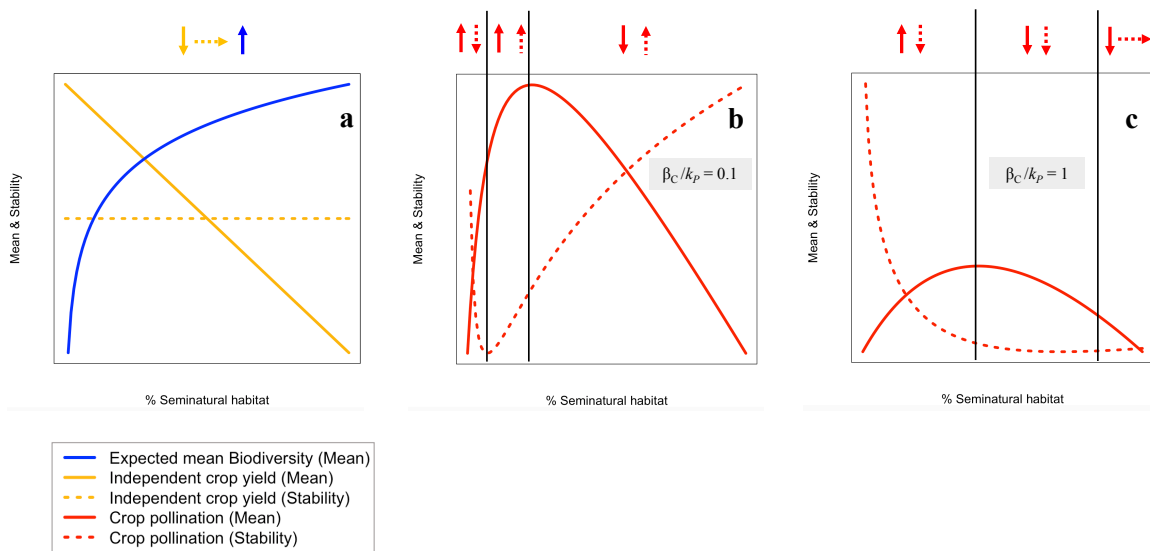

14  
 15 (Parameter values:  $\alpha_P = 0.9$ ,  $\beta_P = 0.6$ ,  $A = 10$ ,  $Z_C = 1000$ ,  $\alpha_C = 1000$ ,  $k_W = 5000$ ,  $k_P = 0.1$ ,  $\sigma_P^c = 0.8$ ,  $\sigma_P^d =$   
 16  $0.1$ ,  $\sigma_C^c = 0.03$ ,  $\alpha_C = 1000$ , Pollination dependence = 50%; Species-area relationship [ $S=c (\omega_{sn} A)^z$ ]:  $c=10$ ,  
 17  $z=0.25$ )
